# Supplementary material
Source: PubMed Central journal article supplement (PMC6955334)
Supplement: pnas.1912132117.sapp.pdf [file pnas.1912132117.sapp.pdf]

# PNAS

[www.pnas.org](http://www.pnas.org)

Supplementary Information for

**Analysis of allosteric communication in a multienzyme complex by ancestral sequence reconstruction**

Michael Schupfner, Kristina Straub, Florian Busch, Rainer Merkl, and Reinhard Sterner\*

Reinhard Sterner  
Email: [reinhard.sterner@ur.de](mailto:reinhard.sterner@ur.de)

**This PDF file includes:**

Figures S1 to S5  
Tables S1 to S7  
Legend for Dataset S1  
SI References

**Other supplementary materials for this manuscript include the following:**

Dataset S1

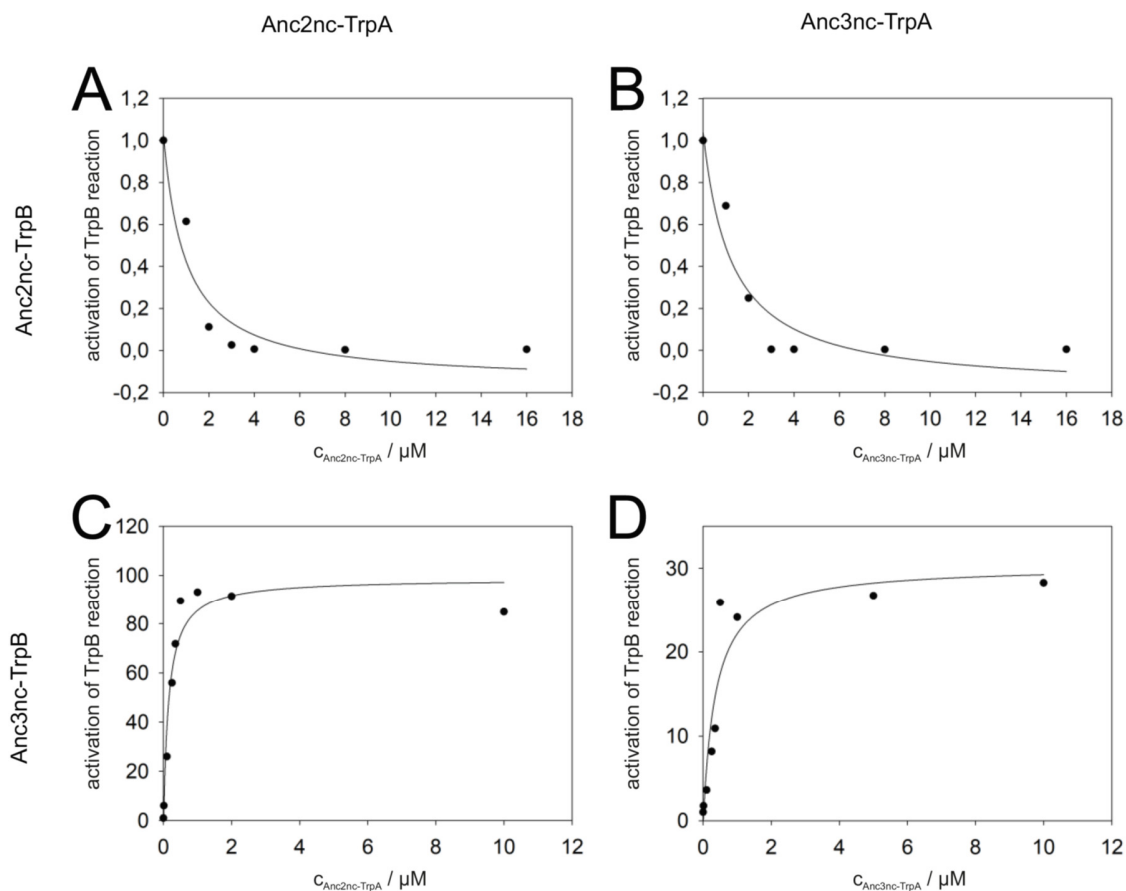

**Figure S1. Activity titrations of TrpB subunits with TrpA subunits of Anc2nc-TS and Anc3nc-TS.** Anc2nc-TrpB (2  $\mu M$ , monomer concentration) was titrated with varying concentrations of Anc2nc-TrpA (A) and Anc3nc-TrpA (B). Anc3nc-TrpB (0.5  $\mu M$ , monomer concentration) was titrated with varying concentrations of Anc2nc-TrpA (C) and Anc3nc-TrpA (D). The titrations were performed at 30 °C in presence of 100 mM KP pH 7.5, 180 mM KCl, 40  $\mu M$  PLP, 200  $\mu M$  indole, and 50 mM L-serine for Anc2nc-TrpB or 250 mM L-serine for Anc3nc-TrpB. TrpB activities were followed by monitoring the condensation of indole and L-serine to L-tryptophan at a wavelength of 290 nm.

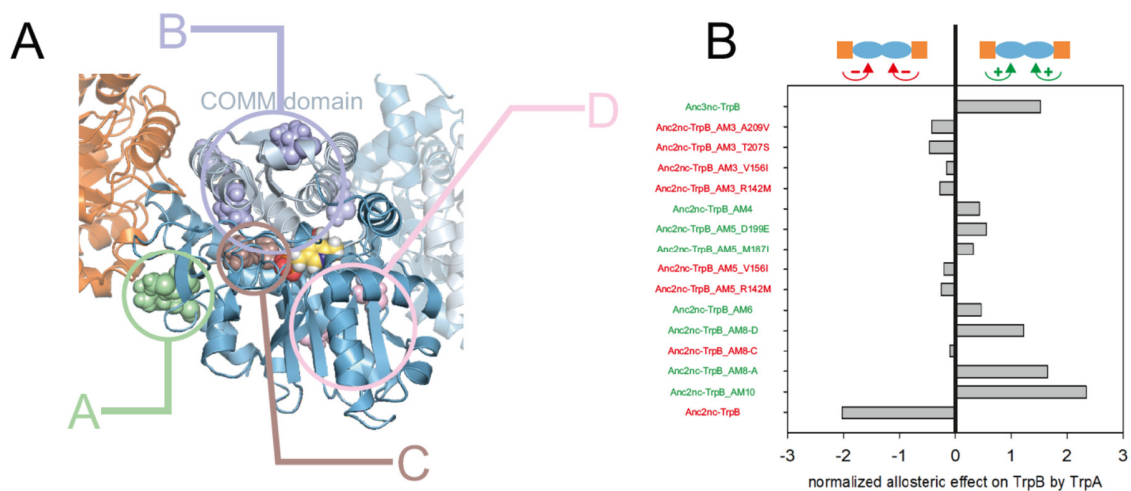

**Figure S2. Structural clustering of 10 *a-def* positions in TrpB and subsequent identification of four *a-ess* positions.** (A) Homology model of Anc2nc-TS with TrpB colored in blue and TrpA colored in orange. The 10 *a-def* positions are represented as spheres, colored according to the clusters they belong to. Cluster A (colored in light green) is located next to the TrpA-TrpB interface. Cluster B (colored in light blue) is positioned within the COMM domain. Cluster C (colored in brown) is located close to the active site, which is indicated by the spherical representation of the PLP cofactor (colored in yellow). Cluster D (colored in pink) lies close to the TrpB-TrpB homodimer interface. (B) Assay for the allosteric effect of TrpA on TrpB. All protein variants that contributed to the identification of the four relevant positions *a-ess* are shown. The normalized allosteric effect is defined as the decadic logarithm of the TrpB activity in presence of TrpA divided by the TrpB activity in absence of TrpA. Raw data are given in **Table S6**.

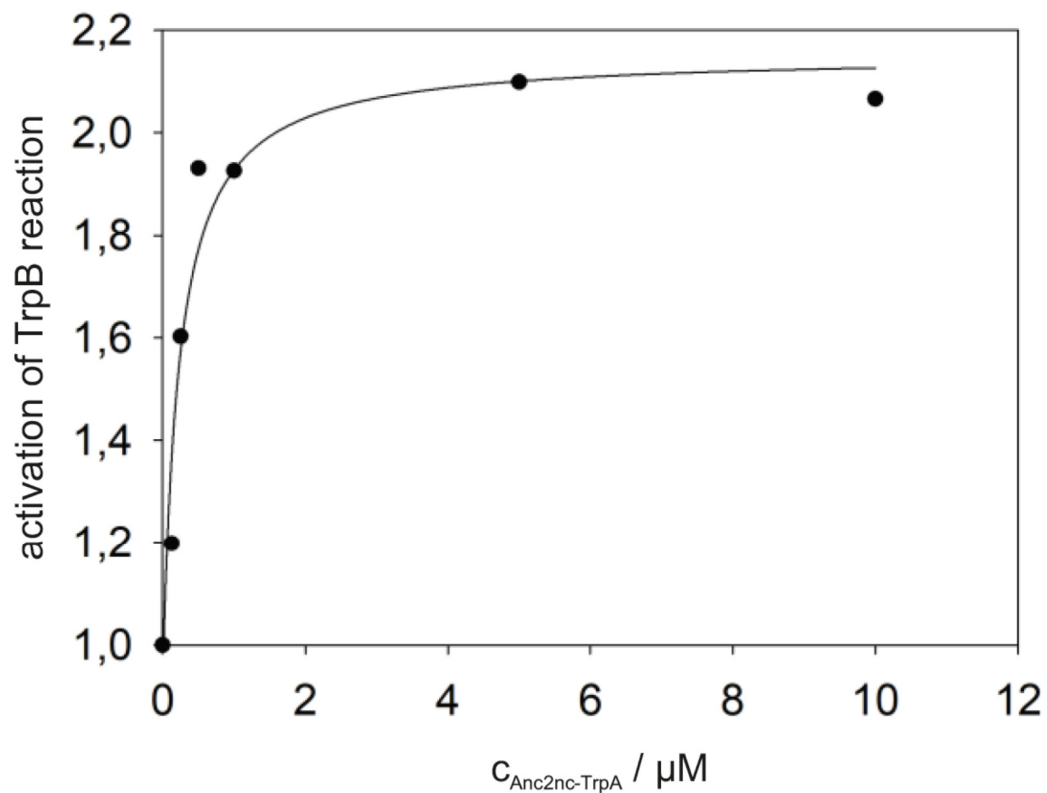

**Figure S3. Activity titration of Anc2nc-TrpB\_AM4 with Anc2nc-TrpA.** TrpB\_AM4 (0.5  $\mu\text{M}$ , monomer concentration) was titrated with varying concentrations of Anc2nc-TrpA. The experiment was performed at 30 °C in presence of 100 mM KP pH 7.5, 180 mM KCl, 40  $\mu\text{M}$  PLP, 200  $\mu\text{M}$  indole, 50 mM L-serine. TrpB activity was followed by monitoring the condensation of indole and L-serine to L-tryptophan at a wavelength of 290 nm.

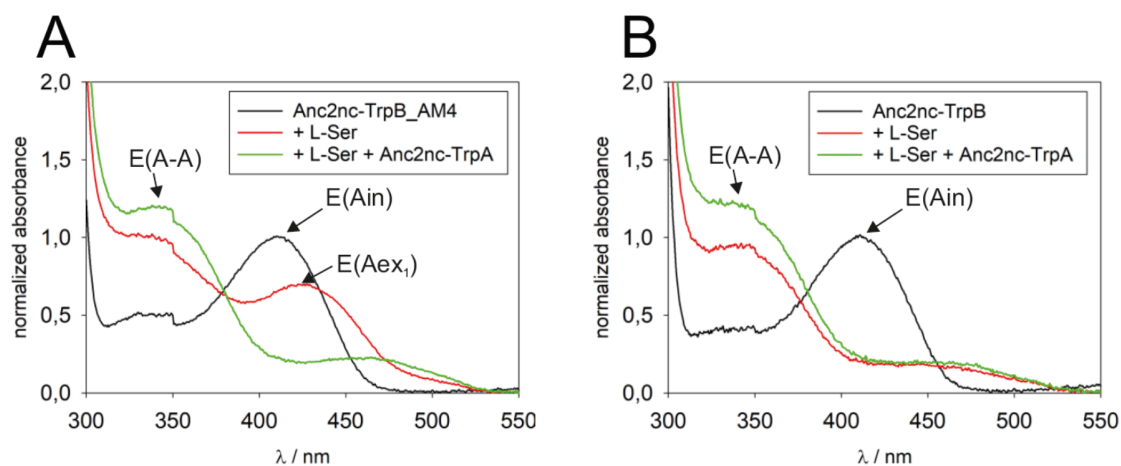

**Figure S4. UV/Vis spectra of Anc2nc-TrpB\_AM4 and Anc2nc-TrpB in their holo-forms, in presence of L-serine, and in presence of L-serine and Anc2nc-TrpA.** (A) Anc2nc-TrpB\_AM4 (10  $\mu$ M, monomer concentration) (black), after addition of 20 mM L-serine (red), and after addition of 20 mM L-serine plus 10  $\mu$ M Anc2nc-TrpA (green). (B) Anc2nc-TrpB (10  $\mu$ M, monomer concentration) (black), after addition of 20 mM L-serine (red), and after addition of 20 mM L-serine plus 10  $\mu$ M Anc2nc-TrpA (green). Spectra were collected at 30  $^{\circ}$ C in 50 mM potassium phosphate buffer, pH 7.5. The intermediates of the TrpB reaction (internal aldimine, E(Ain); external aldimine E(Aex<sub>1</sub>); aminoacrylate, E(A-A)) were identified according to their respective absorbance maxima (1). The spectra were normalized with the value of the absorbance of the E(Ain) peak at 412 nm set to 1.

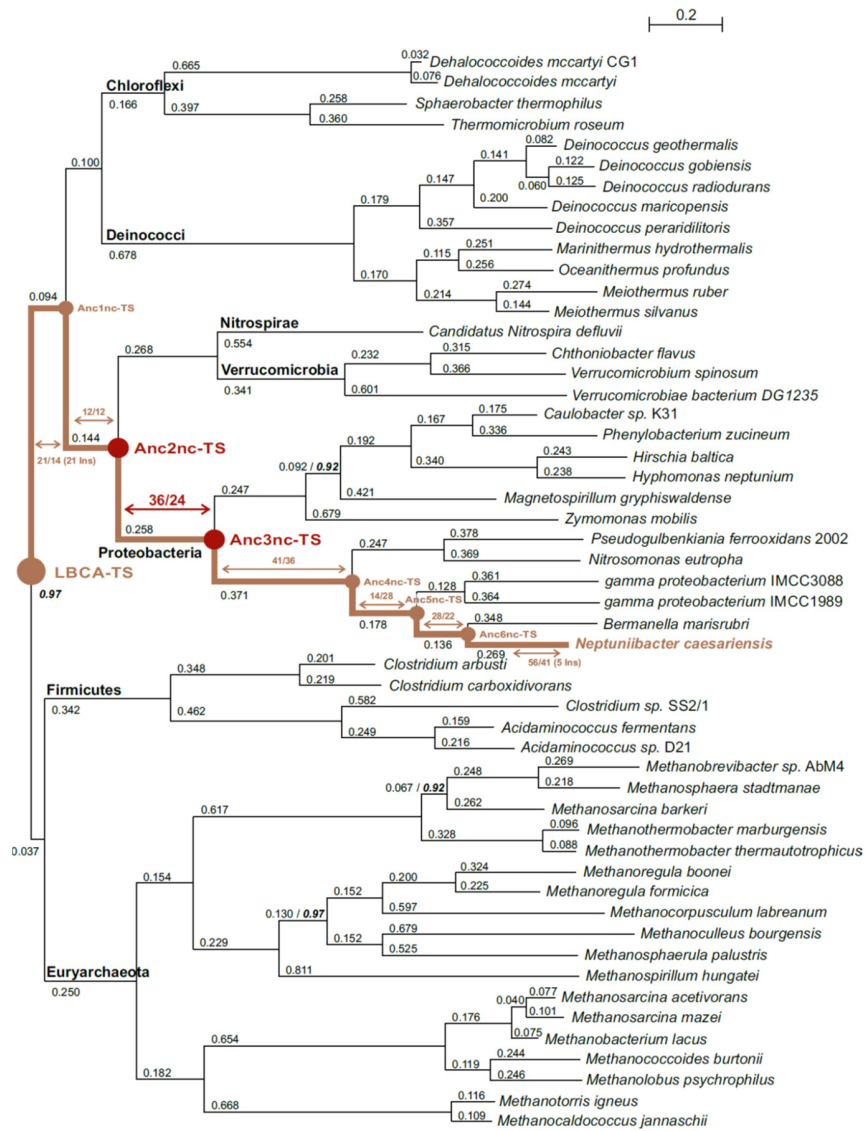

**Figure S5. Phylogenetic tree for the reconstruction of ancestral TS.** The tree has been midpoint-rooted according to the phylogenetic relationship of extant TS (2). The location of LBCA-TS corresponds to the root and is indicated by a brown dot. The evolutionary path from LBCA-TS to the extant TS of *Neptuniibacter caesariensis* is highlighted in brown and the positions of all intermediate sequences Anc\*nc-TS are indicated. The two intermediates (Anc2nc-TS and Anc3nc-TS) that effect the switching from TrpB-inhibition to TrpB-activation by TrpA are printed in red. Next to the double arrows, the number of mutations distinguishing the TrpA/TrpB sequences related to the adjacent nodes are given as well as the number of insertions (Ins) in the TrpB sequences. For all edges, the corresponding rate of mutations per site is listed (compare to the bar at the top, which corresponds to 0.2 mutations per site). To indicate the robustness of the tree, posterior probabilities of all bifurcations are listed. 97 of the posterior probabilities are  $\geq 0.99$ ; the four smaller ones, all of which are  $\geq 0.92$ , are printed as numbers formatted in **italics and bold**.

**Table S1. Primer used for site-directed mutagenesis.**

Bases in **bold** and underlined indicate mutated positions.

| Target construct              | Template                      | Introduced mutation | forward/<br>reverse | Primer sequence 5'→3'                                                                            | Method |
|-------------------------------|-------------------------------|---------------------|---------------------|--------------------------------------------------------------------------------------------------|--------|
| pET21a_Anc2nc-TrpB_AM10_H24R  | pET21a_Anc2nc-TrpB_AM10       | H24R                | forward<br>reverse  | <b><u>CGT</u></b> TTTGGTCCGTATGGT<br>ACCACGTGCATCCGG                                             | PNK    |
| pET21a_Anc2nc-TrpB_AM8-A      | pET21a_Anc2nc-TrpB_AM10_H24R  | R300M               | forward<br>reverse  | <b><u>ATG</u></b> ACCTATCTGCTGC<br>GCTACCATGCGAAG                                                | PNK    |
| pET21a_Anc2nc-TrpB_AM10_T207S | pET21a_Anc2nc-TrpB_AM10       | T207S               | forward<br>reverse  | ACATTATTGGC <b><u>TCT</u></b> GTTGCCGG<br>CCGGCAAC <b><u>AGA</u></b> GCCAATAATGT                 | QCM    |
| pET21a_Anc2nc-TrpB_AM8-C      | pET21a_Anc2nc-TrpB_AM10_T207S | A209V               | forward<br>reverse  | TGGCTCTGTT <b><u>GTT</u></b> GGTCCGCAT<br>ATGCGGACC <b><u>AAC</u></b> AACAGAGCCA                 | QCM    |
| pET21a_Anc2nc-TrpB_AM10_S73T  | pET21a_Anc2nc-TrpB_AM10       | S73T                | forward<br>reverse  | GTCGTCCG <b><u>ACC</u></b> CCGCTGTATT<br>AATACAGCG <b><u>GGT</u></b> CGGACGAC                    | QCM    |
| pET21a_Anc2nc-TrpB_AM8-D      | pET21a_Anc2nc-TrpB_AM10_S73T  | R227E               | forward<br>reverse  | GCGTTATTGGT <b><u>GAA</u></b> GAAGCACG<br>TC<br>GACGTGCTT <b><u>C</u></b> TTCACCAATAAC<br>GC     | QCM    |
| pET21a_Anc2nc-TrpB_AM7-A_S73T | pET21a_Anc2nc-TrpB_AM8-A      | S73T                | forward<br>reverse  | GTCGTCCG <b><u>ACC</u></b> CCGCTGTATT<br>AATACAGCG <b><u>GGT</u></b> CGGACGAC                    | QCM    |
| pET21a_Anc2nc-TrpB_AM6        | pET21a_Anc2nc-TrpB_AM7-A_S73T | R227E               | forward<br>reverse  | GCGTTATTGGT <b><u>GAA</u></b> GAAGCACG<br>TC<br>GACGTGCTT <b><u>C</u></b> TTCACCAATAAC<br>GC     | QCM    |
| pET21a_Anc2nc-TrpB_AM5_R142M  | pET21a_Anc2nc-TrpB_AM6        | R142M               | forward<br>reverse  | CGTTGCAGCA <b><u>ATG</u></b> TTTGGTCTG<br>GAAT<br>ATTCCAGACCA <b><u>AAC</u></b> ATTGCTGC<br>AACG | QCM    |
| pET21a_Anc2nc-TrpB_AM5_V156I  | pET21a_Anc2nc-TrpB_AM6        | V156I               | forward<br>reverse  | GTGCCGAAG <b><u>ATA</u></b> TTGAACGTCA<br>G<br>CTGACGTTCA <b><u>A</u></b> TATCTTCGGCA<br>C       | QCM    |
| pET21a_Anc2nc-TrpB_AM5_M187I  | pET21a_Anc2nc-TrpB_AM6        | M187I               | forward<br>reverse  | TGAAAGATGCA <b><u>ATT</u></b> AATGAAGC<br>AATG<br>CATTGCTTCATT <b><u>AAT</u></b> TGCATCTT<br>TCA | QCM    |
| pET21a_Anc2nc-TrpB_AM5_D199E  | pET21a_Anc2nc-TrpB_AM6        | D199E               | forward<br>reverse  | TACCAATGT <b><u>GAA</u></b> GATACCTAT<br>TAC<br>GTAATAGGTATC <b><u>TTC</u></b> CACATTGG<br>TA    | QCM    |
| pET21a_Anc2nc-TrpB_AM4        | pET21a_Anc2nc-TrpB_AM5_M187I  | D199E               | forward<br>reverse  | TACCAATGT <b><u>GAA</u></b> GATACCTAT<br>TAC<br>GTAATAGGTATC <b><u>TTC</u></b> CACATTGG<br>TA    | QCM    |

**Table S2. Amino acid sequences of experimentally characterized proteins.** Sequence colored in red: His<sub>6</sub>-tag for IMAC purification. In case of pMAL-c5T constructs, the His<sub>6</sub>-MBP-tag sequence contains a thrombin cleavage site (LVPR|GS) which was exploited to remove the His<sub>6</sub>-MBP-tag from the desired amino acid sequence. The residual GSH sequence is colored in green. Sequence colored in blue: Initial methionine (M1). Sequence in **bold** and underlined: Residues that were mutated compared to the respective wild-type sequence.

| Construct            | Protein     | Studied amino acid sequence                                                                                                                                                                                                                                                                                                                                                                                                                                                 |
|----------------------|-------------|-----------------------------------------------------------------------------------------------------------------------------------------------------------------------------------------------------------------------------------------------------------------------------------------------------------------------------------------------------------------------------------------------------------------------------------------------------------------------------|
| pET21a_LBCA-TrpA (2) | LBCA-TrpA   | <u>M</u> NRIAEAFEELKKKGEKALIPFITAGDPDLETTLELVRALVEAGADIIELGIPFSDPLADGPTIQRASQR<br>ALASGTTLDKVFEMVRELREKNTDVPVFLTYNPIFRYGIERFVKECAEAGVDGLVDPDPPEEAADL<br>AAAAEKYGVLDLFLVAPTSTDERIKMIAKHASGFVYCVSVTGVGTGARSEIADLAELVSRIRKHTDLPI<br>AVFGISTPEQAAEVAQVADGVIVGSAIVKRIENQDEEDIVEEVREFVRELREAVKLEHHHHHH                                                                                                                                                                            |
| pET21a_LBCA-TrpB (2) | LBCA-TrpB   | <u>M</u> IGRFGKYGGQYVPETLMPALELEEAYERAKNDPEFQAELEYLRDVGRTPLYFAENLTKDLG<br>GAKIYLRKREDLNHTGAHKINNALGQALLAKRMGKRRVIAETGAGQHGVATATVAAMFGLGCVVY<br>MGAEDIERQALNVFRMKLLGAKVSRVTSGSRTLKDAINEAMRDWVTNVEDTFYIIGSVVGPHPYP<br>MMVDRDFQSVIGEEARQQILEKEGRLPDAIVACVGGGSNAMGIFHPFDDESVRLLIGVEAAGKGIET<br>GKHAATLSAGRPGVLHGAMTYLLQDEDEGQIEAHSISAGLDYPGVGPPEHAYLKDTRAEYVSVTDD<br>EALFAQLLSRTEGIIPALESSHAVAYAMKLAPELSKDQIIVVNLSSGRGDKDVNTVARYLLGVLELLE<br>HHHHHH                             |
| pUR28a_Anc1nc-TrpA   | Anc1nc-TrpA | <u>M</u> HHHHHLEMNRIAEFAKLKAEKALIPYITAGDPDLETTLELVRALVEAGADIIELGIPFSDPLA<br>DGPTIQRASQRALASGTTLAKVLEMVRELREKNTDVPVFMVYTYNPIYSYGLERFVKECAEAGVDGL<br>IVPDLPEEAADLAAAARKHGLDLIFLLAPTSTDERIKLIAKHASGFVYCVSVTGVGTGARSELAADLAE<br>LVSRIRKHTDLPIAVFGISTPEQAAEVAQVADGVVVGSAIVKRIENQDEEDLVEEVAAFVRELREA<br>VK                                                                                                                                                                        |
| pET21a_Anc1nc-TrpB   | Anc1nc-TrpB | <u>M</u> NVSTNVMATTTKSKAALPDARGRFKYGGRYVPETLMPALELEEAYERAKRDPDFQAELEYLK<br>DYVGRPTPLYFAENLTLGGAKIYLRKREDLNHTGAHKINNALGQALLAKRMGKRRVIAETGAGQH<br>GVATATVAAMFGLGCVVYMGAEEDIERQALNVFRMKLLGAEVSRVTSGSRTLKDAINEAMRDWVT<br>NVEDTYIIGSVVGPHPYPMVDRDFQSVIGEEARQQILEKEGRLPDAIVACVGGGSNAMGIFHPFI<br>DDESVRLLIGVEAAGGIEETGKHAASLSAGRPGVLHGSMTYLLQDEDEGQIEAHSISAGLDYPGVGP<br>HSYLKDTGRAEYVSVTDDLEALFAQLLSRTEGIIPALESSHAIYAVKLAPEMSKDQIIVVNLSSGRGDK<br>DVNTVARYLLGVLELLEHHHHHH           |
| pUR28a_Anc2nc-TrpA   | Anc2nc-TrpA | <u>M</u> HHHHHLEMNRIAEFAKLKAEKALIPYITAGDPDLETTLELVRALVEAGADIIELGIPFSDPLA<br>DGPVIQRASQRALASGTTLRKVLVEMVRELREKNTVPIVLMTYNPIYSYGLERFVKEAAEAGVDGLI<br>VPDLPEEAADLAAAAREHGLDLIFLLAPTSTDERIKLIAKHASGFVYVSVTGVGTGARSELAADLAEK<br>VARIRKHTDLPIAVFGISTPEQAAEVAQVADGVVVGSAIVKRIENQDEEDLVEEVAAFVRELREA<br>VK                                                                                                                                                                          |
| pET21a_Anc2nc-TrpB   | Anc2nc-TrpB | <u>M</u> NVSTNVMATTPKSKAALPDARGRFKYGGRYVPETLMPALELEEAYERAKRDPDFQAELEYLK<br>KEYVGRPTPLYFAERLTLGGAKIYLRKREDLNHTGAHKINNALGQALLAKRMGKRRVIAETGAGQH<br>HGVATATVAAMFGLGCVVYMGAEEDIERQALNVFRMKLLGAEVSRVTSGSRTLKDAINEAMRDW<br>VTNVEDTYIIGSVVGPHPYPMVDRDFQSVIGEEARQQILEKEGRLPDALVACVGGGSNAMGLFH<br>PFIDDEGVRMIGVEAGGHGIEETGKHAASLSGGRPGVLHGSMTYLLQDEDEGQIEAHSISAGLDYPG<br>VGPEHSYLKDTGRAEYVSVTDDLEALFAQLLSRTEGIIPALESSHAIYAVKLAPEMSKDQIIVVNLSS<br>GRGDKDVNTVARYLLGVLELLEHHHHHH        |
| pUR28a_Anc3nc-TrpA   | Anc3nc-TrpA | <u>M</u> HHHHHLEMNRIAAFAKLKAEKALIPYITAGDPDLETTLELMLHALVEAGADIIELGVPFSDP<br>MADGPIQRASQRALASGTTLRDVLVEMVAEFRETDTEPIVLMGYANPIYSYGMGERFAKAAAEAG<br>VDGLIVDLPPEEAALAAALREHGIDLIFLLAPTSPDERIKLIAEHASGFVYVSVTGVGTGARSADAA<br>DVAAKVARIRKHTDLPIAVFGIKTPEQAAEVAQVADGVVVGSAIVNEIEAQDEENLTAAVAALVR<br>ELRAAVK                                                                                                                                                                         |
| pET21a_Anc3nc-TrpB   | Anc3nc-TrpB | <u>M</u> NASTNVSATTPKSYAALPDARGHFGPYGGRYVPETLMPALELEEAYERAKRDPDFQAELEYLK<br>HYVGRPSPLYFAERLTLGGAKIYLRKREDLNHTGAHKINNALGQALLAKRMGKRRVIAETGAGQH<br>GVATATVAARFGLGCVVYMGAEEDVERQALNVFRMKLLGAEVSRVTSGSRTLKDAINEAMRDW<br>VTNVDVDTFYIIGTVAGPHYPYPMVDRDFQSVIGREARQQILEKEGRLPDALVACVGGGSNAMGLFH<br>PFIDDEGVRMIGVEAGGHGIEETGKHAASLSGGRPGVLHGNRTYLLQDEDEGQIEAHSISAGLDYPG<br>VGPEHSWLKDIGRAEYVSVTDDLEALFAQLLSRLEGIIPALESSHALAYAAKLAPMTMSKDQIIVVNL<br>SSGRGDKDVNTVARYLLGVLELLEHHHHHH    |
| pUR28a_Anc4nc-TrpA   | Anc4nc-TrpA | <u>M</u> HHHHHLEMNRIAAFAKLKAEKALIPYITAGDPDPTTVDLMLHALVEAGADIIELGVPFSDP<br>MADGPIQRASERLAHNTSLRDVLEMVAEFRETDTEPVVLMGYANPIEAMGYERFAKAAAEAG<br>GVDGLVTLVDPPEEAALAAALKEHGIDPIFLAPTTPPEQRVLIKAEHASGFVYVSVYKVTGAGNL<br>DVDDVAAKLARIRQHTDLPIGVGFGIKDGETAASVAEADGVVVGSAIVNKEIEAQDEENLKA<br>AALVAELRAAVD                                                                                                                                                                             |
| pET21a_Anc4nc-TrpB   | Anc4nc-TrpB | <u>M</u> NASTNVSAILSKYAQLPDARGHFGPYGGRVFAETLMAALDELEEAYERAKRDPDFQAEFDRDL<br>KHVGRPSPLYFAERWTEHLGGAKIYLRKREDLNHTGAHKVNNITIGQALLAKRMGKRRVIAETGAG<br>QHGVASATVAARFGLGCVVYMGAEEDVERQALNVFRMKLLGAEVSRVTSGSRTLKDAINEAMRD<br>WVTNVDVDTFYIIGTVAGPHYPYPMVDRDFQSVIGREARQQMLEQEGRLPDALVACVGGGSNAIGL<br>FHPFIEDEGVRMIGVEAGGHGIEETGKHAAPLSAGRPGVLHGNRTYLMQDEDEGQIETHSVSAGLD<br>YPGVGPEHSWLKDIGRAEYVAVTDDEALAAFHALTRIEGIMPALLESSHALAYAAKLAPMTMSKDQIIV<br>VNLSSGRGDKDINTVAQYLSGINLLEHHHHHH |



|                          |                   |                                                                                                                                                                                                                                                                                                                                                                                                                                     |
|--------------------------|-------------------|-------------------------------------------------------------------------------------------------------------------------------------------------------------------------------------------------------------------------------------------------------------------------------------------------------------------------------------------------------------------------------------------------------------------------------------|
| pMAL-c5T_Anc5nc-TrpA     | Anc5nc-TrpA       | GSHMNRIDACFALKAEKKALIPYITAGDPPDPVTVDLMHALVEAGADIIELGVPFSDPMADGPV IQLACERALAHNTSLRDVLEMVAEFRETDTEPIVLMGYANPIEAMGYERFAKAAAEAGVDGVLTV DLPPEEAELNAALKEHGIDTIFLLAPTTPEQRVKLIVEHASGYVYVSVKGVGTGAGNLVDVDAAK LARIRQHTDLPIGVGFGIKDGEAASVAEVDGTVVGSALVNIKIGELQDENIKAAVAALVAEIRSA VD                                                                                                                                                           |
| pET21a_Anc5nc-TrpB       | Anc5nc-TrpB       | MNASTNVSAILDKAYALQPDANGHFGPYGGRFVSETLMAALDDLEEMERYLKRDPAFQAEFDKDL AHYVGRPSPLYFAERWTEKVGAKIYLRKEDLNHTGAHKVNTTIGQALLAKYMGKKRVIETGAG QHGVSATVAARLGLCEQVYMGAEDEVQRALNVYRMKLLGAEVVPTSGTRTLKDMNEAMR DWVTNVDFTYIIGTVAGPHYPMLVRDFQSVIGREARQCLEQGRLPDALVACVGGGSNAIGL FHPFIDEGVAMYGVEAGGHGIEGKHAAPLSAGRPGVLHGNRTYLMQDEGQIIEHSHVSAGLD YPGVGPESHYKLDIGRVEYVAATDEEALAAFHALTRVEGIMPALESSHALAYAAKLAATMSKDQII VVNLSGRGDKDIHTVAEYLDGINIFLEHHHHHH     |
| pMAL-c5T_Anc6nc-TrpA     | Anc6nc-TrpA       | GSHMNRIDACFALKAEKKALIPYITAGDPEPDPVTVDLMHALVEAGADIIELGVPFSDPMADGPV IQLACERALAHNTSLRDVLEMVAEFRETDTEPIVLMGYLNPIEVMGYERFAKAAAEAGVDGVLTV DLPPEESAELNQILKEHGIDTIFLLAPTTPEQRVKLICEHSGSYLYYVSVKGVTSASLDVDDVANKLE RIRKHTDLPLGVGFGIKDGEAASVAVKADGVIVGSALVNIKIELQDDDNKSEVAALITEIRSAMD                                                                                                                                                          |
| pET21a_Anc6nc-TrpB       | Anc6nc-TrpB       | MNASTNVSAILDKALSQLPDANGHFGPYGGRFVSETLMAALDDLEEMERYLKRDPAFQAEFDKDL AHYVGRPSPLYFAERLTKVGGAKIYLRKEDLNHTGAHKVNTTIGQALLAKYTGKPRVIAETGAGQ HGVASATVAARLGLCEQVYMGAEDEVQRALNVYRMKLLGAEVVPTSGTRTLKDMNEAMRD WVTNVDFTYIIGTVAGPHYPKLVDRFQSVIGREARQCLEQGRLPDALVACVGGGSNAIGLFH PFIEDGEVAMYGVEAGGHGIEGKHAAPLSAGKPGVLHGNRTYLMQDENGQIMGTHSHVSAGLD YPGVGPESHYKLDIGRVEYVAATDEEALDAFHALTRVEGIMPALESSHAVAYAMKLAATMDKQII VVNLSGRGDKDIHTVAEYLDGINIFLEHHHHHH |
| pMAL-c5T_ncTrpA          | ncTrpA            | GSHMSRISSTFKLTKTEGRKALIPYVITAGDPAPGVTVGLLHAMVEAGADVIELGVPFSDPMADGPV IQLACERALAHNTSLRDVLEMVAEFQKDDVTPVLMGYLNPIELGYERFAQEAQKAGVDGVLTV DLPPEESQFHMNRHREHDITTYLLAPTTESRVKYVCENGSGYLYYVSVKGVTSASLDVQVSNKLE EVVRKYTDLPLGVGFGIKDAESATS SVKVAEGVIVGSVLVNIAELVKDQDNIAPEVAIINDMRTA MDS                                                                                                                                                        |
| pUR28a_ncTrpB            | ncTrpB            | MHHHHHLEMPNIDLKALSQLPDSNGHFGPYGGRFVSETLMAALKQLEETYEKLWRDPAFQEE FDRDLAHYVGRPSPLYFAKHLTEKVGAKIFLRKEDLNHTGAHKVNTTIGQALLAKYTGKPRVIAET GAGQHGVSATVAARLGLCEQVYMGAEDEVQRALNVYRMKLLGAEVSVESGTRTLKDMNEA MRDWVTNVDNTFYIIGTVAGPHYPKLVDRFQCVIGREARQCLEDQGRLPDALVACVGGGSNA IGLFHPFIEDADVVMYGVEAGGYGVETGQHAAPLSAGSPGVLHGNRTYLMQDEGQIIEHSHVSVA GLDYPGVGPEHAYLKDTRATYVADTDEEAMDAFALTRVEGIMPALESSHAVAYAMKLAEMD KDQITVNLSGRGDKDIHTVAEQIDGINI          |
| pET21a_Anc2nc-TrpB_AM10  | Anc2nc-TrpB_AM10  | MNVSTNVMATTPKSKAALPDARGHFGPYGGRYVPELMPALEEEEAERAKRDPAFQAEFDYLL KEYVGRPSPLYFAERLTHELGGAKIYLRKEDLNHTGAHKINNAIGQALLAKRMGKKRVIETGAGQ HGVATATVAARFGLCEVYMGAEDEVQRALNVFRMKLLGAEVVPTSGSRTLKDMNEAMRD WVTNVDFTYIIGTVAGPHYPMMVDRFQSVIGREARQILEKEGRLPDALVACVGGGSNAMGL FHPFIDDEGVRMIGVEAGGHGIEGKHAASLSGGRPGVLHGSRTYLLQDEGQIIEHSHSAGLDYP GVGPEHSYKLDTGRAEYVSVTDEALEAFQLLSRTEGIIPALESSHAIAYAVKLAPEMSKDQIIVNLS GRGDKDVNTVARYLLGVLELLEHHHHHH        |
| pET21a_Anc3nc-TrpB_AM10  | Anc3nc-TrpB_AM10  | MNASTNVSATTPKSYAALPDARGHFGPYGGRYVPELMPALEEEEAERAKRDPAFQAEFDYLL KEYVGRPTPLYFAERLTHELGGAKIYLRKEDLNHTGAHKINNAIGQALLAKRMGKKRVIETGAGQ HGVATATVAARFGLCEVYMGAEDEVQRALNVFRMKLLGAEVVPTSGSRTLKDMNEAMRD WVTNVDFTYIIGTVAGPHYPMMVDRFQSVIGREARQILEKEGRLPDALVACVGGGSNAMGLFHP FIDDEGVRMIGVEAGGHGIEGKHAASLSGGRPGVLHGNMTYLLQDEGQIIEHSHSAGLDYPGV GPEHSYKLDTGRAEYVSVTDEALEAFQLLSRTEGIIPALESSHAIAYAVKLAPEMSKDQIIVNLS GRGDKDVNTVARYLLGVLDLELLEHHHHHH      |
| pET21a_Anc2nc-TrpB_AM8-A | Anc2nc-TrpB_AM8-A | MNVSTNVMATTPKSKAALPDARGHFGPYGGRYVPELMPALEEEEAERAKRDPAFQAEFDYLL KEYVGRPSPLYFAERLTHELGGAKIYLRKEDLNHTGAHKINNAIGQALLAKRMGKKRVIETGAGQ HGVATATVAARFGLCEVYMGAEDEVQRALNVFRMKLLGAEVVPTSGSRTLKDMNEAMRD WVTNVDFTYIIGTVAGPHYPMMVDRFQSVIGREARQILEKEGRLPDALVACVGGGSNAMGL FHPFIDDEGVRMIGVEAGGHGIEGKHAASLSGGRPGVLHGSMTYLLQDEGQIIEHSHSAGLDYP GVGPEHSYKLDTGRAEYVSVTDEALEAFQLLSRTEGIIPALESSHAIAYAVKLAPEMSKDQIIVNLS GRGDKDVNTVARYLLGVLELLEHHHHHH        |
| pET21a_Anc2nc-TrpB_AM8-C | Anc2nc-TrpB_AM8-C | MNVSTNVMATTPKSKAALPDARGHFGPYGGRYVPELMPALEEEEAERAKRDPAFQAEFDYLL KEYVGRPSPLYFAERLTHELGGAKIYLRKEDLNHTGAHKINNAIGQALLAKRMGKKRVIETGAGQ HGVATATVAARFGLCEVYMGAEDEVQRALNVFRMKLLGAEVVPTSGSRTLKDMNEAMRD WVTNVDFTYIIGTVAGPHYPMMVDRFQSVIGREARQILEKEGRLPDALVACVGGGSNAMGL FHPFIDDEGVRMIGVEAGGHGIEGKHAASLSGGRPGVLHGSRTYLLQDEGQIIEHSHSAGLDYP GVGPEHSYKLDTGRAEYVSVTDEALEAFQLLSRTEGIIPALESSHAIAYAVKLAPEMSKDQIIVNLS GRGDKDVNTVARYLLGVLELLEHHHHHH        |
| pET21a_Anc2nc-TrpB_AM8-D | Anc2nc-TrpB_AM8-D | MNVSTNVMATTPKSKAALPDARGHFGPYGGRYVPELMPALEEEEAERAKRDPAFQAEFDYLL KEYVGRPTPLYFAERLTHELGGAKIYLRKEDLNHTGAHKINNAIGQALLAKRMGKKRVIETGAGQ HGVATATVAARFGLCEVYMGAEDEVQRALNVFRMKLLGAEVVPTSGSRTLKDMNEAMRD WVTNVDFTYIIGTVAGPHYPMMVDRFQSVIGREARQILEKEGRLPDALVACVGGGSNAMGL FHPFIDDEGVRMIGVEAGGHGIEGKHAASLSGGRPGVLHGSRTYLLQDEGQIIEHSHSAGLDYP GVGPEHSYKLDTGRAEYVSVTDEALEAFQLLSRTEGIIPALESSHAIAYAVKLAPEMSKDQIIVNLS GRGDKDVNTVARYLLGVLELLEHHHHHH        |

|                              |                       |                                                                                                                                                                                                                                                                                                                                                                                                                                                    |
|------------------------------|-----------------------|----------------------------------------------------------------------------------------------------------------------------------------------------------------------------------------------------------------------------------------------------------------------------------------------------------------------------------------------------------------------------------------------------------------------------------------------------|
| pET21a_Anc2nc-TrpB_AM6       | Anc2nc-TrpB_AM6       | MNVSTNMATTPKSKAALPDARGRFGPYGGRYVPETLMPALEEEAYERAKRDPAFQALDYYL<br>KEYVGRPTPLYFAERLTHELGGAKIYLRKREDLNHTGAHKINNAIGQALLAKRMGKKRVIETGAGQ<br>HGVATATVAARFGLCEVVYMGAEDEVQALNVFRMKLLGAEVRPVTSGSRTLKDAINEAMRD<br>WVTNVDDTYIIGTVAGPHYPMMVDRFQSVIGEEARQQILEKEGRLPDALVACVGGGSNAMGL<br>FHPIDDEGVRMIGVEAGGHIETGKHAASLSGGRPGVLHGSMTYLLQDEDGQIEAHSISAGLDY<br>PGVGPESHYKDTGRAEYVSVTDDEALEAFQLLSRTEGIIPALESSHAIAAYAVKLAPEMSKDQIIVVNL<br>SGRGDKDVNTVARYLLGVLELLEHHHHH |
| pET21a_Anc2nc-TrpB_AM5_R142M | Anc2nc-TrpB_AM5_R142M | MNVSTNMATTPKSKAALPDARGRFGPYGGRYVPETLMPALEEEAYERAKRDPAFQALDYYL<br>KEYVGRPTPLYFAERLTHELGGAKIYLRKREDLNHTGAHKINNAIGQALLAKRMGKKRVIETGAGQ<br>HGVATATVAAMFGLCEVVYMGAEDEVQALNVFRMKLLGAEVRPVTSGSRTLKDAINEAMRD<br>WVTNVDDTYIIGTVAGPHYPMMVDRFQSVIGEEARQQILEKEGRLPDALVACVGGGSNAMGL<br>FHPIDDEGVRMIGVEAGGHIETGKHAASLSGGRPGVLHGSMTYLLQDEDGQIEAHSISAGLDY<br>PGVGPESHYKDTGRAEYVSVTDDEALEAFQLLSRTEGIIPALESSHAIAAYAVKLAPEMSKDQIIVVNL<br>SGRGDKDVNTVARYLLGVLELLEHHHHH |
| pET21a_Anc2nc-TrpB_AM5_V156I | Anc2nc-TrpB_AM5_V156I | MNVSTNMATTPKSKAALPDARGRFGPYGGRYVPETLMPALEEEAYERAKRDPAFQALDYYL<br>KEYVGRPTPLYFAERLTHELGGAKIYLRKREDLNHTGAHKINNAIGQALLAKRMGKKRVIETGAGQ<br>HGVATATVAARFGLCEVVYMGAEDEVQALNVFRMKLLGAEVRPVTSGSRTLKDAINEAMRD<br>WVTNVDDTYIIGTVAGPHYPMMVDRFQSVIGEEARQQILEKEGRLPDALVACVGGGSNAMGL<br>FHPIDDEGVRMIGVEAGGHIETGKHAASLSGGRPGVLHGSMTYLLQDEDGQIEAHSISAGLDY<br>PGVGPESHYKDTGRAEYVSVTDDEALEAFQLLSRTEGIIPALESSHAIAAYAVKLAPEMSKDQIIVVNL<br>SGRGDKDVNTVARYLLGVLELLEHHHHH |
| pET21a_Anc2nc-TrpB_AM5_M187I | Anc2nc-TrpB_AM5_M187I | MNVSTNMATTPKSKAALPDARGRFGPYGGRYVPETLMPALEEEAYERAKRDPAFQALDYYL<br>KEYVGRPTPLYFAERLTHELGGAKIYLRKREDLNHTGAHKINNAIGQALLAKRMGKKRVIETGAGQ<br>HGVATATVAARFGLCEVVYMGAEDEVQALNVFRMKLLGAEVRPVTSGSRTLKDAINEAMRD<br>WVTNVDDTYIIGTVAGPHYPMMVDRFQSVIGEEARQQILEKEGRLPDALVACVGGGSNAMGL<br>FHPIDDEGVRMIGVEAGGHIETGKHAASLSGGRPGVLHGSMTYLLQDEDGQIEAHSISAGLDY<br>PGVGPESHYKDTGRAEYVSVTDDEALEAFQLLSRTEGIIPALESSHAIAAYAVKLAPEMSKDQIIVVNL<br>SGRGDKDVNTVARYLLGVLELLEHHHHH |
| pET21a_Anc2nc-TrpB_AM5_D199E | Anc2nc-TrpB_AM5_D199E | MNVSTNMATTPKSKAALPDARGRFGPYGGRYVPETLMPALEEEAYERAKRDPAFQALDYYL<br>KEYVGRPTPLYFAERLTHELGGAKIYLRKREDLNHTGAHKINNAIGQALLAKRMGKKRVIETGAGQ<br>HGVATATVAARFGLCEVVYMGAEDEVQALNVFRMKLLGAEVRPVTSGSRTLKDAINEAMRD<br>WVTNVDDTYIIGTVAGPHYPMMVDRFQSVIGEEARQQILEKEGRLPDALVACVGGGSNAMGL<br>FHPIDDEGVRMIGVEAGGHIETGKHAASLSGGRPGVLHGSMTYLLQDEDGQIEAHSISAGLDY<br>PGVGPESHYKDTGRAEYVSVTDDEALEAFQLLSRTEGIIPALESSHAIAAYAVKLAPEMSKDQIIVVNL<br>SGRGDKDVNTVARYLLGVLELLEHHHHH |
| pET21a_Anc2nc-TrpB_AM4       | Anc2nc-TrpB_AM4       | MNVSTNMATTPKSKAALPDARGRFGPYGGRYVPETLMPALEEEAYERAKRDPAFQALDYYL<br>KEYVGRPTPLYFAERLTHELGGAKIYLRKREDLNHTGAHKINNAIGQALLAKRMGKKRVIETGAGQ<br>HGVATATVAARFGLCEVVYMGAEDEVQALNVFRMKLLGAEVRPVTSGSRTLKDAINEAMRD<br>WVTNVDDTYIIGTVAGPHYPMMVDRFQSVIGEEARQQILEKEGRLPDALVACVGGGSNAMGL<br>FHPIDDEGVRMIGVEAGGHIETGKHAASLSGGRPGVLHGSMTYLLQDEDGQIEAHSISAGLDY<br>PGVGPESHYKDTGRAEYVSVTDDEALEAFQLLSRTEGIIPALESSHAIAAYAVKLAPEMSKDQIIVVNL<br>SGRGDKDVNTVARYLLGVLELLEHHHHH |
| pET21a_Anc2nc-TrpB_AM3_R142M | Anc2nc-TrpB_AM3_R142M | MNVSTNMATTPKSKAALPDARGRFGPYGGRYVPETLMPALEEEAYERAKRDPAFQALDYYL<br>KEYVGRPTPLYFAERLTHELGGAKIYLRKREDLNHTGAHKINNAIGQALLAKRMGKKRVIETGAGQ<br>HGVATATVAAMFGLCEVVYMGAEDEVQALNVFRMKLLGAEVRPVTSGSRTLKDAINEAMRD<br>WVTNVDDTYIIGTVAGPHYPMMVDRFQSVIGEEARQQILEKEGRLPDALVACVGGGSNAMGL<br>FHPIDDEGVRMIGVEAGGHIETGKHAASLSGGRPGVLHGSMTYLLQDEDGQIEAHSISAGLDY<br>PGVGPESHYKDTGRAEYVSVTDDEALEAFQLLSRTEGIIPALESSHAIAAYAVKLAPEMSKDQIIVVNL<br>SGRGDKDVNTVARYLLGVLELLEHHHHH |
| pET21a_Anc2nc-TrpB_AM3_V156I | Anc2nc-TrpB_AM3_V156I | MNVSTNMATTPKSKAALPDARGRFGPYGGRYVPETLMPALEEEAYERAKRDPAFQALDYYL<br>KEYVGRPTPLYFAERLTHELGGAKIYLRKREDLNHTGAHKINNAIGQALLAKRMGKKRVIETGAGQ<br>HGVATATVAARFGLCEVVYMGAEDEVQALNVFRMKLLGAEVRPVTSGSRTLKDAINEAMRD<br>WVTNVDDTYIIGTVAGPHYPMMVDRFQSVIGEEARQQILEKEGRLPDALVACVGGGSNAMGL<br>FHPIDDEGVRMIGVEAGGHIETGKHAASLSGGRPGVLHGSMTYLLQDEDGQIEAHSISAGLDY<br>PGVGPESHYKDTGRAEYVSVTDDEALEAFQLLSRTEGIIPALESSHAIAAYAVKLAPEMSKDQIIVVNL<br>SGRGDKDVNTVARYLLGVLELLEHHHHH |
| pET21a_Anc2nc-TrpB_AM3_T207S | Anc2nc-TrpB_AM3_T207S | MNVSTNMATTPKSKAALPDARGRFGPYGGRYVPETLMPALEEEAYERAKRDPAFQALDYYL<br>KEYVGRPTPLYFAERLTHELGGAKIYLRKREDLNHTGAHKINNAIGQALLAKRMGKKRVIETGAGQ<br>HGVATATVAARFGLCEVVYMGAEDEVQALNVFRMKLLGAEVRPVTSGSRTLKDAINEAMRD<br>WVTNVDDTYIIGTVAGPHYPMMVDRFQSVIGEEARQQILEKEGRLPDALVACVGGGSNAMGL<br>FHPIDDEGVRMIGVEAGGHIETGKHAASLSGGRPGVLHGSMTYLLQDEDGQIEAHSISAGLDY<br>PGVGPESHYKDTGRAEYVSVTDDEALEAFQLLSRTEGIIPALESSHAIAAYAVKLAPEMSKDQIIVVNL<br>SGRGDKDVNTVARYLLGVLELLEHHHHH |
| pET21a_Anc2nc-TrpB_AM3_A209V | Anc2nc-TrpB_AM3_A209V | MNVSTNMATTPKSKAALPDARGRFGPYGGRYVPETLMPALEEEAYERAKRDPAFQALDYYL<br>KEYVGRPTPLYFAERLTHELGGAKIYLRKREDLNHTGAHKINNAIGQALLAKRMGKKRVIETGAGQ<br>HGVATATVAARFGLCEVVYMGAEDEVQALNVFRMKLLGAEVRPVTSGSRTLKDAINEAMRD<br>WVTNVDDTYIIGTVAGPHYPMMVDRFQSVIGEEARQQILEKEGRLPDALVACVGGGSNAMGL<br>FHPIDDEGVRMIGVEAGGHIETGKHAASLSGGRPGVLHGSMTYLLQDEDGQIEAHSISAGLDY<br>PGVGPESHYKDTGRAEYVSVTDDEALEAFQLLSRTEGIIPALESSHAIAAYAVKLAPEMSKDQIIVVNL<br>SGRGDKDVNTVARYLLGVLELLEHHHHH |

|                        |                 |                                                                                                                                                                                                                                                                                                                                                                                                                                                                               |
|------------------------|-----------------|-------------------------------------------------------------------------------------------------------------------------------------------------------------------------------------------------------------------------------------------------------------------------------------------------------------------------------------------------------------------------------------------------------------------------------------------------------------------------------|
| pET21a_LBCA-TrpB_AM4   | LBCA-TrpB_AM4   | <p>MIGRFGKYGGQYVPETLMPALEEEAYERAKNDPEFQAELEYLRDYVGRPTPLYFAENLTKDLG<br/> GAKIYLRREDLNHTGAHKINNALGQALLAKRMGKRVIAETGAGQHGVATATVAARFGLGECVVY<br/> MGAEDVERQALNVFRMKLLGAKVRPVTSGSRTLKDAINEAMRDWVTNVEDTFYIIGTVAGPHPY<br/> PMMVVRDFQSVIGEEARQQILEKEGRLPDAIVACVGGGSNAMGIFHPFIDDESRLIGVEAAGKIE<br/> TGKHAATLSAGRPGVLHGAMTYLLQDEDEGQIEAHSISAGLDYPGVGPPEHAYLKDTRAEYVSVTD<br/> DEALEAFQLLSRTEGIIPALESSHAVAYAMKLAPELSKDQIIVVNLSGRGDKDVNTVARYLLGVELD<br/> EHHHHHH</p>                       |
| pET21a_Anc3nc TrpB_AM4 | Anc3nc-TrpB_AM4 | <p>MNASTNVSATTPKSYAALPDARGHFGPYGGRYVPETLMPALEEEAYERAKRDPAFQAELOYLK<br/> HYVGRPSPLYFAERLTHELGGAKIYLRREDLNHTGAHKINNAIGQALLAKRMGKRVIAETGAGQH<br/> GVATATVAAMFGLGECVVYMGAEDEJERQALNVFRMKLLGAEVRPVTSGSRTLKDMNEAMRDW<br/> VTNVDDTFYIIGSVVGPHPYPMMVVRDFQSVIGREARQQILEKEGRLPDALVACVGGGSNAMGLFH<br/> PFIDDEGVRMIGVEAGGHGIEGKHAASLSGGRPGVLHGVRNRYLLQDEDEGQIEAHSISAGLDYPG<br/> VGPEHSWLKDIGRAEYVSVTDEALAAFQLLSRLEGIIPALESSHALAYAAKLAPTMASKDQIIVVNLS<br/> GRGDKDVNTVARYLLGVLDLEHHHHHH</p> |

**Table S3. Strategy for the identification of positions relevant for the direction of the allosteric effect of TrpA on TrpB.**

The color code is as in **Figure S2A**: Mutations colored in light green are located in Cluster A. Mutations colored in light blue are located in Cluster B. Mutations colored in brown are located in Cluster C. Mutations colored in pink are located in Cluster D. The activation (+) or inhibition (-) column is based on experimental results shown in **Figure S2B**.

| Step                                                                             | Protein           | Mutated positions                                                                                                                                                                                                                                                                                                                                                                                                                                                                                                                                                                                                                                                                                                                                       | Allosteric effect on TrpB | Conclusion                                                                                                                                                                                                                                                    |
|----------------------------------------------------------------------------------|-------------------|---------------------------------------------------------------------------------------------------------------------------------------------------------------------------------------------------------------------------------------------------------------------------------------------------------------------------------------------------------------------------------------------------------------------------------------------------------------------------------------------------------------------------------------------------------------------------------------------------------------------------------------------------------------------------------------------------------------------------------------------------------|---------------------------|---------------------------------------------------------------------------------------------------------------------------------------------------------------------------------------------------------------------------------------------------------------|
| #1 "wildtype" Anc2nc-TrpB                                                        | Anc2nc-TrpB       | none                                                                                                                                                                                                                                                                                                                                                                                                                                                                                                                                                                                                                                                                                                                                                    | -                         | none                                                                                                                                                                                                                                                          |
| #2 Anc2nc-TrpB with 10 unique positions mutated towards Anc3nc identity          | Anc2nc-TrpB_AM10  | <div style="display: flex; flex-direction: column; gap: 2px;"> <div style="background-color: #d9ead3; padding: 2px;">R24H</div> <div style="background-color: #d9ead3; padding: 2px;">M300R</div> <div style="background-color: #d9ead3; padding: 2px;">M142R</div> <div style="background-color: #d9ead3; padding: 2px;">I156V</div> <div style="background-color: #d9ead3; padding: 2px;">I187M</div> <div style="background-color: #d9ead3; padding: 2px;">E199D</div> <div style="background-color: #d9ead3; padding: 2px;">S207T</div> <div style="background-color: #d9ead3; padding: 2px;">V209A</div> <div style="background-color: #d9ead3; padding: 2px;">T73S</div> <div style="background-color: #d9ead3; padding: 2px;">E227R</div> </div> | +                         | 10 mutated positions are sufficient to inverse the allosteric effect on TrpB                                                                                                                                                                                  |
| #3 Anc2nc-TrpB_AM10 Cluster A, C and D separately backmutated to Anc2nc identity | Anc2nc-TrpB_AM8-A | <div style="display: flex; flex-direction: column; gap: 2px;"> <div style="background-color: #d9ead3; padding: 2px;">M142R</div> <div style="background-color: #d9ead3; padding: 2px;">I156V</div> <div style="background-color: #d9ead3; padding: 2px;">I187M</div> <div style="background-color: #d9ead3; padding: 2px;">E199D</div> <div style="background-color: #d9ead3; padding: 2px;">S207T</div> <div style="background-color: #d9ead3; padding: 2px;">V209A</div> <div style="background-color: #d9ead3; padding: 2px;">T73S</div> <div style="background-color: #d9ead3; padding: 2px;">E227R</div> </div>                                                                                                                                    | +                         | <div style="background-color: #d9ead3; padding: 2px; display: inline-block;">R24H</div><br><div style="background-color: #d9ead3; padding: 2px; display: inline-block;">M300R</div><br>are <u>not</u> required for inversion of the allosteric effect on TrpB |
|                                                                                  | Anc2nc-TrpB_AM8-C | <div style="display: flex; flex-direction: column; gap: 2px;"> <div style="background-color: #d9ead3; padding: 2px;">R24H</div> <div style="background-color: #d9ead3; padding: 2px;">M300R</div> <div style="background-color: #d9ead3; padding: 2px;">M142R</div> <div style="background-color: #d9ead3; padding: 2px;">I156V</div> <div style="background-color: #d9ead3; padding: 2px;">I187M</div> <div style="background-color: #d9ead3; padding: 2px;">E199D</div> <div style="background-color: #d9ead3; padding: 2px;">T73S</div> <div style="background-color: #d9ead3; padding: 2px;">E227R</div> </div>                                                                                                                                     | -                         | <div style="background-color: #d9ead3; padding: 2px; display: inline-block;">S207T</div><br><div style="background-color: #d9ead3; padding: 2px; display: inline-block;">V209A</div><br>are required for inversion of the allosteric effect on TrpB           |
|                                                                                  | Anc2nc-TrpB_AM8-D | <div style="display: flex; flex-direction: column; gap: 2px;"> <div style="background-color: #d9ead3; padding: 2px;">R24H</div> <div style="background-color: #d9ead3; padding: 2px;">M300R</div> <div style="background-color: #d9ead3; padding: 2px;">M142R</div> <div style="background-color: #d9ead3; padding: 2px;">I156V</div> <div style="background-color: #d9ead3; padding: 2px;">I187M</div> <div style="background-color: #d9ead3; padding: 2px;">E199D</div> <div style="background-color: #d9ead3; padding: 2px;">S207T</div> <div style="background-color: #d9ead3; padding: 2px;">V209A</div> </div>                                                                                                                                    | +                         | <div style="background-color: #d9ead3; padding: 2px; display: inline-block;">T73S</div><br><div style="background-color: #d9ead3; padding: 2px; display: inline-block;">E227R</div><br>are <u>not</u> required for inversion of the allosteric effect on TrpB |
| #4 Combinational backmutation of the irrelevant positions from Cluster A and D   | Anc2nc-TrpB_AM6   | <div style="display: flex; flex-direction: column; gap: 2px;"> <div style="background-color: #d9ead3; padding: 2px;">M142R</div> <div style="background-color: #d9ead3; padding: 2px;">I156V</div> <div style="background-color: #d9ead3; padding: 2px;">I187M</div> <div style="background-color: #d9ead3; padding: 2px;">E199D</div> <div style="background-color: #d9ead3; padding: 2px;">S207T</div> <div style="background-color: #d9ead3; padding: 2px;">V209A</div> </div>                                                                                                                                                                                                                                                                       | +                         | the 6 mutated positions are sufficient to inverse the allosteric effect on TrpB                                                                                                                                                                               |

| Step                                                                             | Protein               | Mutated positions                         | Allosteric effect on TrpB | Conclusion                                                                               |
|----------------------------------------------------------------------------------|-----------------------|-------------------------------------------|---------------------------|------------------------------------------------------------------------------------------|
| #5 Anc2nc-TrpB_AM6<br>single backmutation of<br>the positions in Cluster B       | Anc2nc-TrpB_AM5_R142M | I156V<br>I187M<br>E199D<br>S207T<br>V209A | -                         | M142R<br>is required<br>for inversion of<br>the allosteric effect<br>on TrpB             |
|                                                                                  | Anc2nc-TrpB_AM5_V156I | M142R<br>I187M<br>E199D<br>S207T<br>V209A | -                         | I156V<br>is required<br>for inversion of<br>the allosteric effect<br>on TrpB             |
|                                                                                  | Anc2nc-TrpB_AM5_M187I | M142R<br>I156V<br>E199D<br>S207T<br>V209A | +                         | I187M<br>is <u>not</u> required<br>for inversion of<br>the allosteric effect<br>on TrpB  |
|                                                                                  | Anc2nc-TrpB_AM5_D199E | M142R<br>I156V<br>I187M<br>S207T<br>V209A | +                         | E199D<br>is <u>not</u> required<br>for inversion of<br>the allosteric effect<br>on TrpB  |
| #6 Combinational backmutation<br>of the irrelevant positions<br>identified in #5 | Anc2nc-TrpB_AM4       | M142R<br>I156V<br>S207T<br>V209A          | +                         | the 4 mutated positions<br>are sufficient to inverse<br>the allosteric effect<br>on TrpB |
| #7 Anc2nc-TrpB_AM4<br>single backmutation of<br>the last 4 positions             | Anc2nc-TrpB_AM3_R142M | I156V<br>S207T<br>V209A                   | -                         | M142R<br>is required<br>for inversion of<br>the allosteric effect<br>on TrpB             |
|                                                                                  | Anc2nc-TrpB_AM3_V156I | M142R<br>S207T<br>V209A                   | -                         | I156V<br>is required<br>for inversion of<br>the allosteric effect<br>on TrpB             |
|                                                                                  | Anc2nc-TrpB_AM3_T207S | M142R<br>I156V<br>V209A                   | -                         | S207T<br>is required<br>for inversion of<br>the allosteric effect<br>on TrpB             |
|                                                                                  | Anc2nc-TrpB_AM3_A209V | M142R<br>I156V<br>S207T                   | -                         | V209A<br>is required<br>for inversion of<br>the allosteric effect<br>on TrpB             |

**Table S4. Tryptophan formation by TrpB-subunits in absence and presence of the respective TrpA-subunits followed by an HPLC-based assay.**

Experimental conditions: 100 mM EPPS/KOH pH 7.5, 180 mM KCl, 40  $\mu$ M PLP, 45 mM L-serine, 300  $\mu$ M indole, 0.5  $\mu$ M TrpB (monomer) and 1  $\mu$ M TrpA (monomer) at 30 °C. The mean and the standard deviations of two independent measurements are given.

| <b>Protein</b>             | <b>Initial rate of tryptophan formation / nM/s</b> |
|----------------------------|----------------------------------------------------|
| LBCA-TrpB                  | 630 $\pm$ 110                                      |
| LBCA-TrpA + LBCA-TrpB      | 480 $\pm$ 140                                      |
| Anc1nc-TrpB                | 600 $\pm$ 37                                       |
| Anc1nc-TrpA + Anc1nc-TrpB  | 360 $\pm$ 67                                       |
| Anc2nc-TrpB                | 870 $\pm$ 170                                      |
| Anc2nc-TrpA + Anc2nc-TrpB  | 100 $\pm$ 38                                       |
| Anc3nc-TrpB                | 62 $\pm$ 37                                        |
| Anc3nc-TrpA + Anc3nc-TrpB  | 580 $\pm$ 89                                       |
| Anc4nc-TrpB                | 370 $\pm$ 220                                      |
| Anc4nc-TrpA + Anc4nc-TrpB  | 860 $\pm$ 140                                      |
| Anc5nc-TrpB                | 450 $\pm$ 75                                       |
| Anc5nc-TrpA + Anc5nc-TrpB  | 850 $\pm$ 87                                       |
| Anc6nc-TrpB                | 240 $\pm$ 67                                       |
| Anc6nc-TrpA + Anc6nc-TrpBB | 550 $\pm$ 95                                       |
| ncTrpB                     | 41 $\pm$ 33                                        |
| ncTrpA + ncTrpB            | 350 $\pm$ 43                                       |

**Table S5. Tryptophan formation of TrpB-subunits in absence and presence of the respective TrpA-subunits followed by absorbance spectroscopy at 290 nm.**

Experimental conditions: 100 mM potassium phosphate pH 7.5, 180 mM KCl, 40  $\mu$ M PLP, 50 mM L-serine, 200  $\mu$ M indole, 0.5  $\mu$ M TrpB (monomer) and 10  $\mu$ M TrpA (monomer) at 30 °C. The mean and the standard deviations of two independent measurements are given.

| <b>Protein</b>                 | <b>Initial rate of tryptophan formation / nM/s</b> |
|--------------------------------|----------------------------------------------------|
| Anc2nc-TrpB                    | 150 $\pm$ 0.4                                      |
| Anc2nc-TrpB + Anc2nc-TrpA      | 1.5 $\pm$ 0.0                                      |
| Anc2nc-TrpB_AM10               | 0.6 $\pm$ 2.0                                      |
| Anc2nc-TrpB_AM10 + Anc2nc-TrpA | 120 $\pm$ 4.4                                      |
| Anc3nc-TrpB                    | 14 $\pm$ 0.7                                       |
| Anc3nc-TrpB + Anc3nc-TrpA      | 480 $\pm$ 25                                       |
| Anc3nc-TrpB_AM10               | 600 $\pm$ 31                                       |
| Anc3nc-TrpB_AM10 + Anc3nc-TrpA | 9.6 $\pm$ 1.2                                      |

**Table S6. Tryptophan formation of TrpB-subunits in absence and presence of the respective TrpA-subunits followed by absorbance spectroscopy at 290 nm.**

Experimental conditions: 100 mM potassium phosphate pH 7.5, 180 mM KCl, 40  $\mu$ M PLP, 50 mM L-serine, 200  $\mu$ M indole, 0.5  $\mu$ M TrpB (monomer) and 10  $\mu$ M TrpA (monomer) at 30 °C. The mean and the standard deviations of two independent measurements are given.

| <b>Protein</b>                      | <b>Initial velocity of tryptophan formation / nM/s</b> |
|-------------------------------------|--------------------------------------------------------|
| Anc2nc-TrpB                         | 150 $\pm$ 0.4                                          |
| Anc2nc-TrpB + Anc2nc-TrpA           | 1.5 $\pm$ 0.0                                          |
| Anc2nc-TrpB_AM10                    | 0.6 $\pm$ 2.0                                          |
| Anc2nc-TrpB_AM10 + Anc2nc-TrpA      | 120 $\pm$ 4.4                                          |
| Anc2nc-TrpB_AM8-A                   | 6.3 $\pm$ 1.4                                          |
| Anc2nc-TrpB_AM8-A + Anc2nc-TrpA     | 280 $\pm$ 12                                           |
| Anc2nc-TrpB_AM8-C                   | 5.2 $\pm$ 0.5                                          |
| Anc2nc-TrpB_AM8-C + Anc2nc-TrpA     | 4.2 $\pm$ 0.1                                          |
| Anc2nc-TrpB_AM8-D                   | 18 $\pm$ 2.8                                           |
| Anc2nc-TrpB_AM8-D + Anc2nc-TrpA     | 300 $\pm$ 20                                           |
| Anc2nc-TrpB_AM6                     | 110 $\pm$ 0.2                                          |
| Anc2nc-TrpB_AM6 + Anc2nc-TrpA       | 340 $\pm$ 38                                           |
| Anc2nc-TrpB_AM5_R142M               | 360 $\pm$ 19                                           |
| Anc2nc-TrpB_AM5_R142M + Anc2nc-TrpA | 200 $\pm$ 7.9                                          |
| Anc2nc-TrpB_AM5_V156I               | 290 $\pm$ 3.6                                          |
| Anc2nc-TrpB_AM5_V156I + Anc2nc-TrpA | 180 $\pm$ 9.4                                          |
| Anc2nc-TrpB_AM5_M187I               | 105 $\pm$ 4.2                                          |
| Anc2nc-TrpB_AM5_M187I + Anc2nc-TrpA | 220 $\pm$ 1.9                                          |
| Anc2nc-TrpB_AM5_D199E               | 51 $\pm$ 2.3                                           |
| Anc2nc-TrpB_AM5_D199E + Anc2nc-TrpA | 190 $\pm$ 3.8                                          |
| Anc2nc-TrpB_AM4                     | 100 $\pm$ 1.2                                          |



|                                     |           |
|-------------------------------------|-----------|
| Anc2nc-TrpB_AM4 + Anc2nc-TrpA       | 270 ± 2.3 |
| Anc2nc-TrpB_AM3_R142M               | 320 ± 32  |
| Anc2nc-TrpB_AM3_R142M + Anc2nc-TrpA | 170 ± 8.5 |
| Anc2nc-TrpB_AM3_V156I               | 190 ± 6.1 |
| Anc2nc-TrpB_AM3_V156I + Anc2nc-TrpA | 130 ± 7.0 |
| Anc2nc-TrpB_AM3_T207S               | 180 ± 0.2 |
| Anc2nc-TrpB_AM3_T207S + Anc2nc-TrpA | 62 ± 0.1  |
| Anc2nc-TrpB_AM3_A209V               | 91 ± 0.8  |
| Anc2nc-TrpB_AM3_A209V + Anc2nc-TrpA | 35 ± 1.1  |

**Table S7. Tryptophan formation of TrpB-subunits in absence and presence of the respective TrpA-subunits followed by absorbance spectroscopy at 290 nm.**

Experimental conditions: 100 mM potassium phosphate pH 7.5, 180 mM KCl, 40  $\mu$ M PLP, 50 mM L-serine, 200  $\mu$ M indole, 0.5  $\mu$ M TrpB (monomer) and 10  $\mu$ M TrpA (monomer) at 30 °C. The mean and the standard deviations of two independent measurements are given.

| Protein                       | Initial rate of tryptophan formation / nM/s |
|-------------------------------|---------------------------------------------|
| Anc3nc-TrpB                   | 7.1 $\pm$ 0.2                               |
| Anc3nc-TrpB + Anc3nc-TrpA     | 420 $\pm$ 7.7                               |
| Anc3nc-TrpB_AM4               | 120 $\pm$ 5.6                               |
| Anc3nc-TrpB_AM4 + Anc3nc-TrpA | 25 $\pm$ 4.4                                |
| LBCA-TrpB                     | 290 $\pm$ 16                                |
| LBCA-TrpB + LBCA-TrpA         | 39 $\pm$ 3.3                                |
| LBCA-TrpB_AM4                 | 36 $\pm$ 2.6                                |
| LBCA-TrpB_AM4 + LBCA-TrpA     | 170 $\pm$ 1.6                               |

**Dataset S1 (separate file). Posterior probabilities for all residues of LBCA-TS, Anc1nc-TS - Anc6nc-TS in Excel format.** The posterior probabilities are the outcome of the ASR by means of FastML (3) and given for all residues of the reconstructed TrpA and TrpB sequences.

#### SI References

1. A. N. Lane, C. H. Paul, K. Kirschner, The mechanism of self-assembly of the multi-enzyme complex tryptophan synthase from *Escherichia coli*. *EMBO J.* **3**, 279-287 (1984).
2. F. Busch *et al.*, Ancestral tryptophan synthase reveals functional sophistication of primordial enzyme complexes. *Cell Chem. Biol.* **23**, 709-715 (2016).
3. H. Ashkenazy *et al.*, FastML: a web server for probabilistic reconstruction of ancestral sequences. *Nucleic Acids Res.* **40**, W580-584 (2012).
